# Supplementary material for: Genomic and non-genomic pathways are both crucial for peak induction of neurite outgrowth by retinoids
Source: PubMed Central journal article supplement (PMC6498645; doi:10.1186/s12964-019-0352-4), 2019-05-02
Supplement: 12964_2019_352_MOESM1_ESM.pdf [file 12964_2019_352_MOESM1_ESM.pdf]

| Compound    | Genomic Activity<br>(X-Gal RA Based Reporter Assay) |                                          | Non-Genomic Activity<br>(ERK1/2 Phosphorylation Assay) |                                          | Neurite Outgrowth                |                                  |
|-------------|-----------------------------------------------------|------------------------------------------|--------------------------------------------------------|------------------------------------------|----------------------------------|----------------------------------|
|             | Potency (EC <sub>50</sub> )<br>("nM")<br>(95% CI)   | Efficacy (E <sub>max</sub> )<br>(95% CI) | Potency (EC <sub>50</sub> )<br>("nM")<br>(95% CI)      | Efficacy (E <sub>max</sub> )<br>(95% CI) | Fold increase<br>(10 μM)         | Fold increase<br>(10 nM)         |
| ATRA        | 1.044<br>(0.8396 to 1.291)                          | 170.1<br>(164.4 to 175.7)                | 33.07<br>(23.76 to 44.85)                              | 48.55<br>(46.72 to 50.42)                | 2.8                              | Did not induce neurite outgrowth |
| AH61        | 1.954<br>(1.361 to 2.821)                           | 196.1<br>(185.1 to 207.4)                | 18.07<br>(9.765 to 35.5)                               | 44.46<br>(40.82 to 48.35)                | 3.6                              | 1.9                              |
| EC23        | 0.1279<br>(0.08006 to 0.2033)                       | 169.18<br>(159.1 to 180.7)               | 30.55<br>(19.47 to 48.53)                              | 92.51<br>(85.7 to 99.62)                 | 4.3                              | 2.2                              |
| EC19        | Did not induce a genomic response                   |                                          | 50.71<br>(14.77 to 118)                                | 22.65<br>(19.69 to 25.62)                | Did not induce neurite outgrowth |                                  |
| TTNPB       | 0.09958<br>(0.06777 to 0.1462)                      | 108.5<br>(102.8 to 114.2)                | Did not induce a non-genomic response                  |                                          | 2.5                              | Did not induce neurite outgrowth |
| Fenretinide | 52.78<br>(36.88 to 74.29)                           | 150.9<br>(138.8 to 163.7)                | 90.8<br>(58.85 to 138.4)                               | 36.87<br>(34.15 to 39.68)                | Killed the cells                 | 1.7                              |
| A1120       | 107.1<br>(69.46 to 163.2)                           | 93.76<br>(83.61 to 105)                  | 4.323<br>(2.302 to 7.727)                              | 44.87<br>(41.83 to 47.98)                | 3.4                              | 1.7                              |
| CD2665      | Did not induce a genomic response                   |                                          | 4.849<br>(2.969 to 7.672)                              | 44.3<br>(41.6 to 47.05)                  | Did not induce neurite outgrowth |                                  |
| DA124       | Did not induce a genomic response                   |                                          | 18.07<br>(9.765 to 35.5)                               | 44.46<br>(40.82 to 48.35)                | Did not induce neurite outgrowth |                                  |
| HX600       | Did not induce a genomic response                   |                                          | 14.22<br>(9.415 to 21.28)                              | 69.15<br>(65.02 to 73.35)                | Did not induce neurite outgrowth |                                  |
| GZ25        | 0.1838<br>(0.1385 to 0.245)                         | 209.1<br>(201.4 to 216.9)                | 3.57<br>(2.835 to 4.484)                               | 76.62<br>(74.03 to 79.24)                | 3.3                              | 1.9                              |
| DC122       | 24.56<br>(14.56 to 41.67)                           | 89.48<br>(80.75 to 99.01)                | 143.5<br>(117.8 to 174.9)                              | 77.63<br>(74.75 to 80.58)                | 2.4                              | Did not induce neurite outgrowth |
| DC128       | 1.399<br>(0.8395 to 2.384)                          | 192<br>(177.9 to 206.3)                  | 30.37<br>(21.26 to 43.1)                               | 28.85<br>(27.3 to 30.44)                 | 3.1                              | 1.7                              |
| DC271       | 2.284<br>(0.8761 to 5.796)                          | 157.1<br>(136.4 to 179.6)                | 111<br>(76.63 to 159.1)                                | 78.37<br>(73.54 to 83.36)                | 3.4                              | 1.7                              |
| DC303       | 7.98<br>(4.335 to 13.73)                            | 103.2<br>(90.96 to 115.9)                | 390.2<br>(350.4 to 434.2)                              | 65.98<br>(64.42 to 67.57)                | 2.2                              | Did not induce neurite outgrowth |
| DC318       | 24.9<br>(31 to 48.73)                               | 69.38<br>(60.4 to 79.9)                  | Did not induce a non-genomic response                  |                                          | Did not induce neurite outgrowth |                                  |
| DC324       | Did not induce a genomic response                   |                                          | 26.35<br>(19.51 to 35.49)                              | 50.22<br>(47.4 to 53.09)                 | Did not induce neurite outgrowth |                                  |
| DC329       | Did not induce a genomic response                   |                                          | 15.66<br>(12.25 to 20.1)                               | 40.68<br>(39.24 to 42.15)                | Did not induce neurite outgrowth |                                  |
| DC360       | 18.85<br>(8.9 to 39.51)                             | 58.1<br>(50.07 to 66.89)                 | 159.4<br>(117.7 to 215.5)                              | 79.73<br>(75.14 to 84.46)                | 3.3                              | Did not induce neurite outgrowth |
| DC375       | Did not induce a genomic response                   |                                          | 2726<br>(1701 to 4774)                                 | 38.84<br>(33.67 to 46.62)                | 2.8                              | Did not induce neurite outgrowth |
| DC440       | 118.8<br>(84.33 to 165.1)                           | 153<br>(138 to 169.3)                    | 9.313<br>(5.603 to 15.31)                              | 82.28<br>(77.06 to 87.62)                | 3                                | Did not induce neurite outgrowth |
| DC444       | 6.97<br>(3.599 to 12.93)                            | 172.4<br>(154.4 to 191.2)                | Did not induce a non-genomic response                  |                                          | 3.1                              | Did not induce neurite outgrowth |
| DC472       | 32.7<br>(14.52 to 71.19)                            | 76.12<br>(63.96 to 90.78)                | 3.496<br>(2.147 to 5.656)                              | 72.45<br>(68.39 to 76.62)                | 1.9                              | Did not induce neurite outgrowth |
| DC476       | Did not induce a genomic response                   |                                          | 2.004<br>(1.39 to 2.93)                                | 53.91<br>(51.5 to 56.36)                 | 1.9                              | Did not induce neurite outgrowth |
| DC479       | Did not induce a genomic response                   |                                          | 501.6<br>(260.3 to 854.2)                              | 56.77<br>(50.45 to 63.47)                | Did not induce neurite outgrowth |                                  |
| TTNN        | 0.8526<br>(0.373 to 1.784)                          | 118.6<br>(105.8 to 131.7)                | 2.491<br>(1.966 to 3.152)                              | 42.44<br>(40.92 to 43.98)                | 2.9                              | 1.5                              |
| JBGG179     | 6.411<br>(4.612 to 8.728)                           | 118.5<br>(111.9 to 125.3)                | Did not induce a non-genomic response                  |                                          | 2.2                              | Did not induce neurite outgrowth |
| EC23A1      | 64.31<br>(32.67 to 114.9)                           | 210.2<br>(181.9 to 241.2)                | 6.349<br>(46.62 to 84.46)                              | 94<br>(89.63 to 98.43)                   | 3.3                              | Did not induce neurite outgrowth |
| DC547       | 29.79<br>(17.85 to 49.54)                           | 181.9<br>(163.9 to 201.4)                | 484.4<br>(353.4 to 654.5)                              | 53.07<br>(49.48 to 56.83)                | 2.7                              | Did not induce neurite outgrowth |
